# Supplementary material for: New Insights into the Production of Assyrtiko Wines from the Volcanic Terroir of Santorini Island Using Lachancea thermotolerans
Source: MDPI journal article supplement (doi:10.3390/microorganisms12040786), 2024-04-12
Supplement: s1 [file s1]

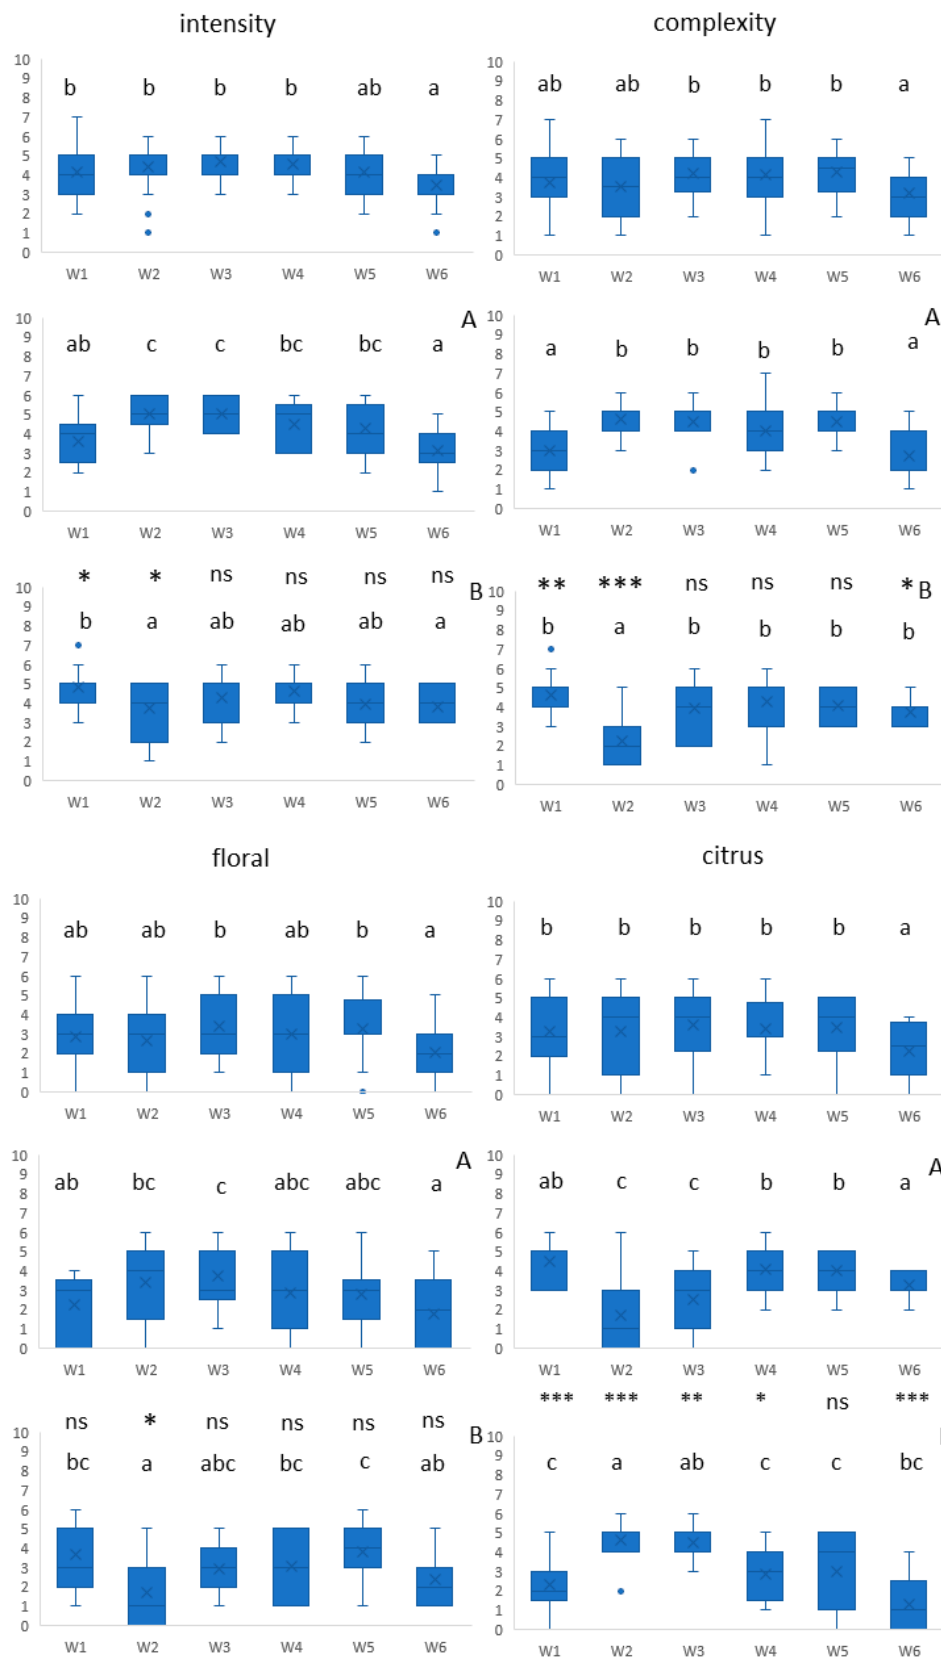

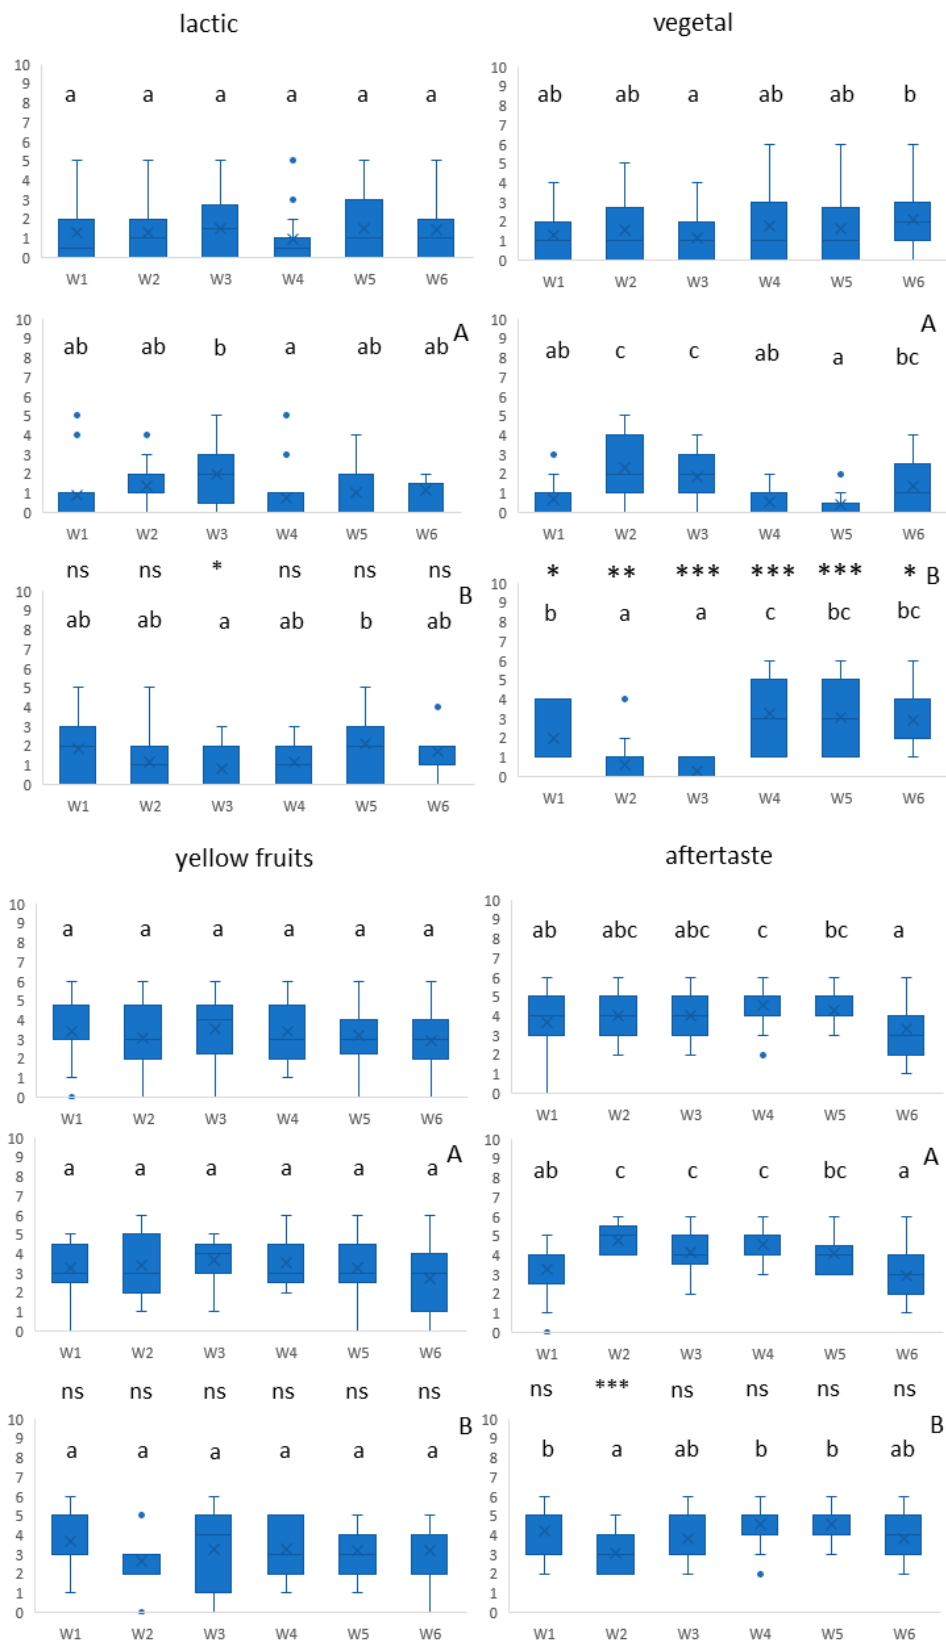

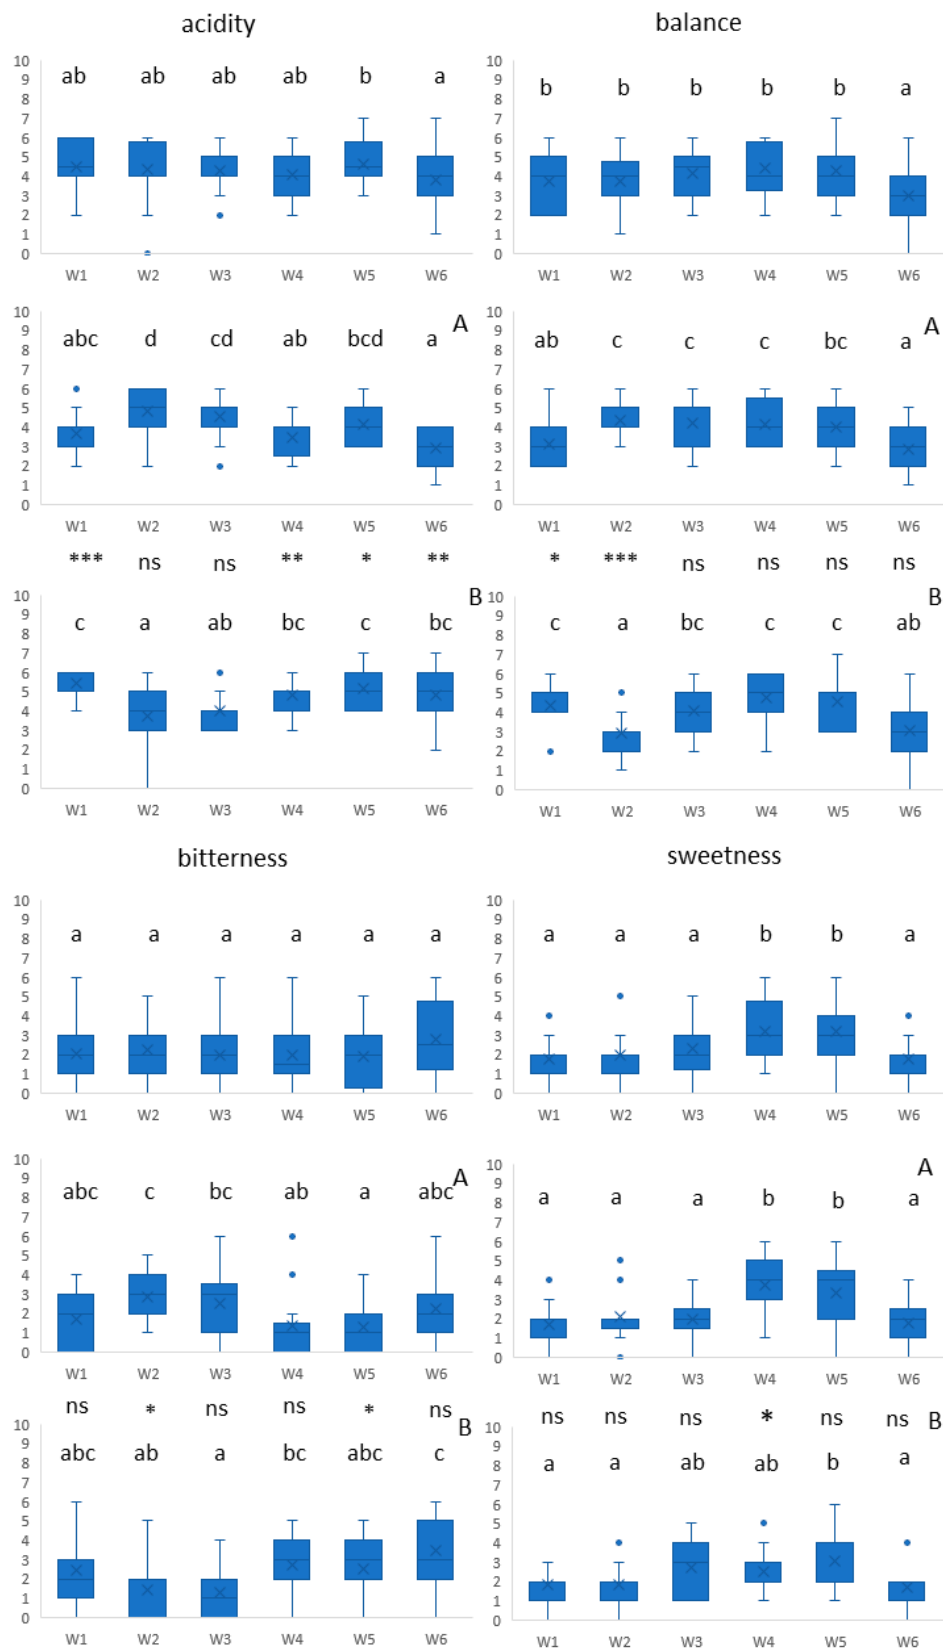

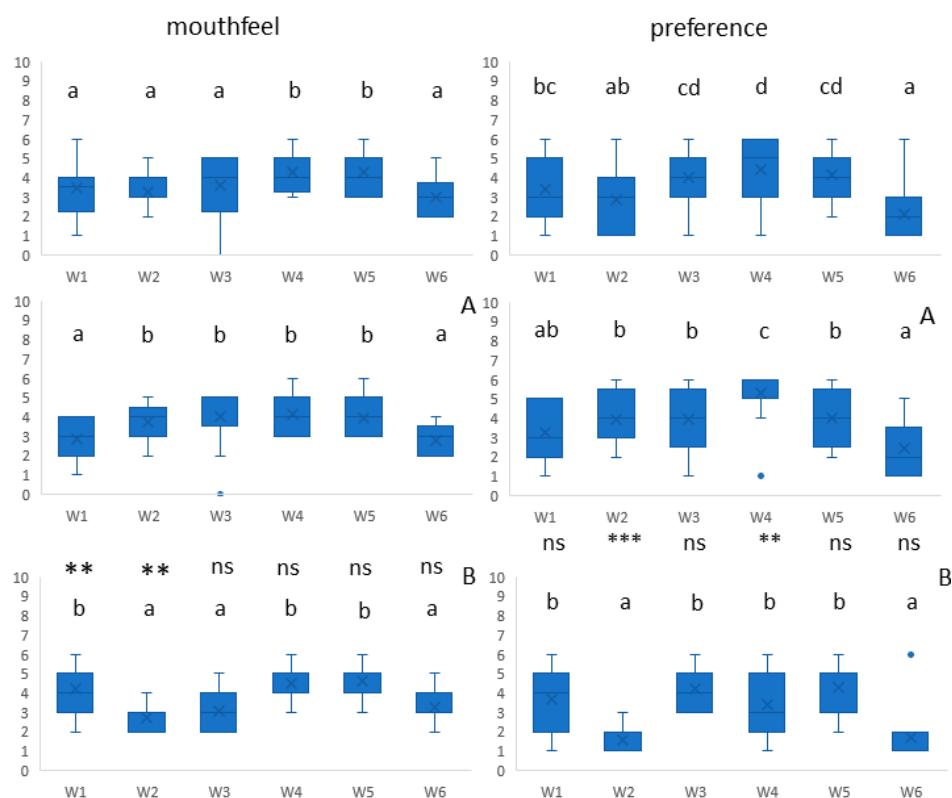

**Figure S1.** Sensory description of the wines produced in the present study. For each descriptor, the upper graph presents the overall description, the graph designated 'A' by the French panel and the graph designated 'B' by the Greek panel. Different letters above each box column designate statistically significant differences ( $p < 0.05$ ) of the specific attribute between the different wines. The stars located between the graphs 'A' and 'B' designate statistically significant differences between the evaluation panels for the specific attribute of the same wine (\*,  $p < 0.05$ ; \*\*,  $p < 0.01$ ; \*\*\*,  $p < 0.001$ ; ns, not significant).
